# Supplementary material for: MicroRNA expression profile of human advanced coronary atherosclerotic plaques
Source: PubMed Central journal article supplement (PMC5959940; doi:10.1038/s41598-018-25690-4), 2018-05-18
Supplement: 41598_2018_25690_MOESM1_ESM.pdf [file 41598_2018_25690_MOESM1_ESM.pdf]

## **MicroRNA expression profile of human advanced coronary atherosclerotic plaques**

Mariana Parahuleva<sup>1, 2\*</sup>, Christoph Lipps<sup>2</sup>, Behnoush Parviz<sup>2</sup>, Hans Hölschermann<sup>3</sup>, Bernhard Schieffer<sup>1</sup>, Rainer Schulz<sup>2</sup>, Gerhild Euler<sup>2</sup>

Internal Medicine/Cardiology and Angiology, University Hospital of Giessen and Marburg, Location Marburg<sup>1</sup>; Internal Medicine I/Cardiology and Angiology, University Hospital of Giessen and Marburg, Location Giessen<sup>2</sup>; Krankenhaus Bad Homburg Innere Medizin I – Kardiologie, Bad Homburg<sup>3</sup>, Germany

**Suppl. Table S1. Target genes of the selected miRNAs and their impact on atherosclerosis**

| <b>miRNA</b> | <b>Target Genes<br/>(inter alia)</b>                                                               | <b>Source</b>                                                       | <b>Impact on<br/>Atherosclerosis/Source<br/>(inter alia)</b>                                                                                         |
|--------------|----------------------------------------------------------------------------------------------------|---------------------------------------------------------------------|------------------------------------------------------------------------------------------------------------------------------------------------------|
| miR-1        | KCNJ2 (K <sup>+</sup> channel subunit Kir2.1)<br><br>GJA1 (Gap junction alpha-1, connexin 43/Cx43) | Yang et al., 2007, Nat Med.                                         | Foam cell formation (Zhang et al. 2016, J Cell Mol Med.)<br><br>Neutrophil migration and plaque formation (Wang, H. et al. 2013, Mol Cell Biochem.). |
| miR-9        | PPAR- $\delta$ (peroxisome proliferator-activated receptor)- $\delta$                              | Thulin et al., 2013, Int J Mol Med.                                 | Migration of SMCs (Marx et al. 1998, Circ Res.)                                                                                                      |
| miR-19b      | Tumor suppressor 53 (p53)                                                                          | Fan et al., 2014, RNA                                               | Cell proliferation/apoptosis during plaque formation (Guevara et al. 1999, Nat Med.)                                                                 |
| miR-21       | Matrix metalloproteinase-9 (MMP-9)                                                                 | Zhang et al., 2017, Biosci Rep.                                     | Makrophage infiltration, collagen deposition, plaque formation (Wang et al. 2015, Arterioscler Thromb Vasc Biol.; Fan et al. 2014, Exp Mol Pathol.)  |
| miR-22       | HMGB1                                                                                              | Huang SC et al. 2017, Cell Physiol Biochem.)                        | Foam cell formation and plaque formation (Ding et al. 2012, Cell Metab., Huang WQ et al. 2017, Cell Physiol Biochem.)                                |
| miR-29b      | CX3CL1 (Chemokine C-X3-C Motif Ligand)                                                             | Yang et al., 2015, Oral Oncol.                                      | Macrophage infiltration and plaque formation (Teupser et al. 2004, Proc Natl Acad Sci U S A)                                                         |
| miR-92a      | KLF2, KLF 4, MYCBP2                                                                                | Pierre et al., 2017, Eur J Immunol. Shankman et al., 2015, Nat Med. | Inflammation and smooth muscle cell dysfunction (s. Table 3) (Raghuraman et al. 2016, Atherosclerosis.)                                              |
| miR-99a      | TRAF7, Transforming growth factor- $\beta$ (TGF- $\beta$ )                                         | Zotti et al., 2012, J Cell Physiol.                                 | Inflammation, chemotaxis, fibrosis, proliferation, and apoptosis (McCaffrey et al. 2010, Front Biosci.; Turcatel et al. 2012, PLoS One)              |

|         |                                                 |      |                                             |                                                                                                          |
|---------|-------------------------------------------------|------|---------------------------------------------|----------------------------------------------------------------------------------------------------------|
| miR-143 | Cyclooxygenase-2 (COX-2)                        |      | Hergenreider et al., 2012, Nat Cell Biol.   | Regulation of the proinflammatory miR-143 in monocytes of AMI patients (Parahuleva et al. 2017, Sci Rep) |
| miR-223 | Tissue factor (TF)                              |      | Li et al., 2014, Atherosclerosis            | Plaque formation and thrombosis (Westrick et al. 2001, Circulation)                                      |
| let-7f  | Tissue inhibitor of metalloproteinases (TIMP-1) | of 1 | Egea et al., 2012, Proc Natl Acad Sci U S A | MMP expression, macrophage infiltration, plaque formation (Rouis et al. 1999, Circulation)               |
