# Supplementary material for: MicroRNA expression profile of human advanced coronary atherosclerotic plaques
Source: PubMed Central journal article supplement (PMC5959940; doi:10.1038/s41598-018-25690-4), 2018-05-18
Supplement: 41598_2018_25690_MOESM2_ESM.pdf [file 41598_2018_25690_MOESM2_ESM.pdf]

## **MicroRNA expression profile of human advanced coronary atherosclerotic plaques**

Mariana Parahuleva<sup>1, 2\*</sup>, Christoph Lipps<sup>2</sup>, Behnoush Parviz<sup>2</sup>, Hans Hölschermann<sup>3</sup>, Bernhard Schieffer<sup>1</sup>, Rainer Schulz<sup>2</sup>, Gerhild Euler<sup>2</sup>

Internal Medicine/Cardiology and Angiology, University Hospital of Giessen and Marburg, Location Marburg<sup>1</sup>; Internal Medicine I/Cardiology and Angiology, University Hospital of Giessen and Marburg, Location Giessen<sup>2</sup>; Krankenhaus Bad Homburg Innere Medizin I – Kardiologie, Bad Homburg<sup>3</sup>, Germany

**Suppl. Table S2. Predicted target genes of miR-92a found using TargetScan PicTar database.**

| Gene symbol | Gene Name                                                                                |
|-------------|------------------------------------------------------------------------------------------|
| MAN2A1      | mannosidase, alpha, class 2A, member 1                                                   |
| CPEB3       | cytoplasmic polyadenylation element binding protein 3                                    |
| SLC17A6     | solute carrier family 17 (sodium-dependent inorganic phosphate cotransporter), member 6  |
| NFYC        | nuclear transcription factor Y, gamma                                                    |
| PIK3R3      | phosphoinositide-3-kinase, regulatory subunit 3 (p55, gamma)                             |
| HAND1       | heart and neural crest derivatives expressed 1                                           |
| FHL2        | four and a half LIM domains 2, transcript variant 1                                      |
| ZCWCC3      | zinc finger, CW type with coiled-coil domain 3                                           |
| FBXW7       | F-box and WD-40 domain protein 7 (archipelago homolog, Drosophila), transcript variant 2 |
| REV3L       | REV3-like, catalytic subunit of DNA polymerase zeta (yeast)                              |
| FHL2        | four and a half LIM domains 2, transcript variant 3                                      |
| FHL2        | four and a half LIM domains 2, transcript variant 4                                      |
| PCTK1       | PCTAIRE protein kinase 1, transcript variant 2                                           |
| BCL9        | B-cell CLL/lymphoma 9                                                                    |
| MYO1B       | myosin IB                                                                                |
| RNF44       | ring finger protein 44                                                                   |
| RAM2        | transcription factor RAM2                                                                |
| BTG2        | BTG family, member 2                                                                     |
| ARMC1       | armadillo repeat containing 1                                                            |
| RAP1B       | RAP1B, member of RAS oncogene family                                                     |
| MGC39518    | hypothetical protein MGC39518                                                            |
| OAZ3        | ornithine decarboxylase antizyme 3                                                       |
| WRNIP1      | Werner helicase interacting protein 1, transcript variant 1                              |
| NFIA        | nuclear factor I/A                                                                       |
| FAD104      | factor for adipocyte differentiation 104                                                 |
| SSTK        | serine/threonine protein kinase SSTK                                                     |
| TSGA14      | testis specific, 14                                                                      |

|           |                                                                                                        |
|-----------|--------------------------------------------------------------------------------------------------------|
| SYN2      | synapsin II, transcript variant IIb                                                                    |
| LBX1      | transcription factor similar to D. melanogaster homeodomain protein lady bird late                     |
| G3BP2     | Ras-GTPase activating protein SH3 domain-binding protein 2, transcript variant 2                       |
| K6IRS2    | keratin protein K6irs                                                                                  |
| CD69      | CD69 antigen (p60, early T-cell activation antigen)                                                    |
| SLC9A3R2  | solute carrier family 9 (sodium/hydrogen exchanger), isoform 3 regulator 2                             |
| BCAT2     | branched chain aminotransferase 2, mitochondrial                                                       |
| ING1L     | inhibitor of growth family, member 1-like                                                              |
| CLK3      | CDC-like kinase 3, transcript variant phlk3                                                            |
| MAP2K4    | mitogen-activated protein kinase kinase 4                                                              |
| HPS6      | Hermansky-Pudlak syndrome 6                                                                            |
| RAB23     | member RAS oncogene family, transcript variant 2                                                       |
| GRIA3     | glutamate receptor, ionotropic, AMPA 3, transcript variant flop                                        |
| FLJ20273  | RNA-binding protein                                                                                    |
| FLJ20399  | hypothetical protein FLJ20399                                                                          |
| DAG1      | dystroglycan 1 (dystrophin-associated glycoprotein 1)                                                  |
| SPHK2     | sphingosine kinase 2                                                                                   |
| C11orf24  | chromosome 11 open reading frame 24                                                                    |
| LOC283377 | hypothetical protein LOC283377                                                                         |
| SESN3     | sestrin 3                                                                                              |
| SEMA3A    | sema domain, immunoglobulin domain (Ig), short basic domain, secreted, (semaphorin) 3A                 |
| TAF15     | TAF15 RNA polymerase II, TATA box binding protein (TBP)-associated factor, 68kDa, transcript variant 2 |
| USF2      | upstream transcription factor 2, c-fos interacting, transcript variant 1                               |
| MEF2D     | MADS box transcription enhancer factor 2, polypeptide D (myocyte enhancer factor 2D)                   |
| GDF11     | growth differentiation factor 11                                                                       |
| LIMR      | lipocalin-interacting membrane receptor                                                                |
| RSBN1     | round spermatid basic protein 1                                                                        |

|          |                                                                             |
|----------|-----------------------------------------------------------------------------|
| PPP1R12C | protein phosphatase 1, regulatory (inhibitor) subunit 12C                   |
| N-PAC    | cytokine-like nuclear factor n-pac                                          |
| MLR2     | ligand-dependent corepressor                                                |
| SNAPC1   | small nuclear RNA activating complex, polypeptide 1, 43kDa                  |
| RNF38    | ring finger protein 38, transcript variant 1                                |
| PDZK3    | PDZ domain containing 3, transcript variant 2                               |
| KIF5B    | kinesin family member 5B                                                    |
| HAND2    | heart and neural crest derivatives expressed 2                              |
| CIC      | capicua homolog (Drosophila)                                                |
| FHL3     | four and a half LIM domains 3                                               |
| MGLL     | monoglyceride lipase, transcript variant 1                                  |
| CPEB2    | cytoplasmic polyadenylation element binding protein 2, transcript variant B |
| RGS3     | regulator of G-protein signalling 3, transcript variant 6                   |
| RGS3     | regulator of G-protein signalling 3, transcript variant 4                   |
| KLF2     | Kruppel-like factor 2 (lung)                                                |
| NOX4     | NADPH oxidase 4                                                             |
| LHFPL2   | lipoma HMGIC fusion partner-like 2                                          |
| GIT2     | G protein-coupled receptor kinase interactor 2, transcript variant 3        |
| NOMO2    | nodal modulator 2, transcript variant 2                                     |
| NOMO1    | nodal modulator 1                                                           |
| NOMO3    | nodal modulator 3                                                           |
| SERTAD3  | SERTA domain containing 3, transcript variant 1                             |
| CDH10    | cadherin 10, type 2 (T2-cadherin)                                           |
| BTBD12   | BTB (POZ) domain containing 12                                              |
| ZDHHC3   | zinc finger, DHHC domain containing 3                                       |
| RPS6KA4  | ribosomal protein S6 kinase, 90kDa, polypeptide 4, transcript variant 1     |
| XYLT2    | xylosyltransferase II                                                       |
| RBBP6    | retinoblastoma binding protein 6, transcript variant 3                      |
| NIPBL    | Nipped-B homolog (Drosophila), transcript variant A                         |
| PLEKHA1  | pleckstrin homology domain containing, family A                             |

|          |                                                                             |
|----------|-----------------------------------------------------------------------------|
|          | (phosphoinositide binding specific) member 1, transcript variant 2          |
| MGC45428 | hypothetical protein MGC45428                                               |
| TACC2    | transforming, acidic coiled-coil containing protein 2, transcript variant 2 |
| ZNF287   | zinc finger protein 287                                                     |
| ARPC2    | actin related protein 2/3 complex, subunit 2, 34kDa, transcript variant 1   |
| TRAF3    | TNF receptor-associated factor 3, transcript variant 3                      |
| UGP2     | UDP-glucose pyrophosphorylase 2, transcript variant 2                       |
| H3F3B    | H3 histone, family 3B (H3.3B)                                               |
| NSMAF    | neutral sphingomyelinase (N-SMase) activation associated factor             |
| PCDH11Y  | protocadherin 11 Y-linked, transcript variant c                             |
| PCDH11X  | protocadherin 11 X-linked, transcript variant c                             |
| SIM2     | single-minded homolog 2 (Drosophila), transcript variant SIM2               |
| NELF     | nasal embryonic LHRH factor                                                 |
| SLC32A1  | solute carrier family 32 (GABA vesicular transporter), member 1             |
| RFX1     | regulatory factor X, 1 (influences HLA class II expression)                 |
| ITGAV    | integrin, alpha V (vitronectin receptor, alpha polypeptide, antigen CD51)   |
| ITGA5    | integrin, alpha 5 (fibronectin receptor, alpha polypeptide)                 |
| HHIP     | hedgehog interacting protein                                                |
| LATS2    | LATS, large tumor suppressor, homolog 2 (Drosophila)                        |
| TCF21    | transcription factor 21, transcript variant 2                               |
| KIAA0063 | KIAA0063 gene product                                                       |
| KCNK10   | potassium channel, subfamily K, member 10, transcript variant 3             |
| FLJ22313 | hypothetical protein FLJ22313                                               |
| SNX2     | sorting nexin 2                                                             |
| ABCG4    | ATP-binding cassette, sub-family G (WHITE), member 4                        |
| TGIF     | TGFB-induced factor (TALE family homeobox), transcript variant 8            |
| GRK5     | G protein-coupled receptor kinase 5                                         |
| NEF3     | neurofilament 3 (150kDa medium)                                             |
| ADM      | adrenomedullin                                                              |

|          |                                                                                              |
|----------|----------------------------------------------------------------------------------------------|
| TCF2     | transcription factor 2, hepatic; LF-B3; variant hepatic nuclear factor, transcript variant a |
| ADCY3    | adenylate cyclase 3                                                                          |
| KIAA1409 | KIAA1409                                                                                     |
| DSCAML1  | Down syndrome cell adhesion molecule like 1                                                  |
| DAB2IP   | DAB2 interacting protein                                                                     |
| TFCP2L2  | transcription factor CP2-like 2, transcript variant 1                                        |
| RBM9     | RNA binding motif protein 9                                                                  |
| MGC11061 | hypothetical protein MGC11061                                                                |
| NRF1     | nuclear respiratory factor 1                                                                 |
| IRS2     | insulin receptor substrate 2                                                                 |
| ARHGEF17 | Rho guanine nucleotide exchange factor (GEF) 17                                              |
| SLC6A1   | solute carrier family 6 (neurotransmitter transporter, GABA), member 1                       |
| GFPT2    | glutamine-fructose-6-phosphate transaminase 2                                                |
| FNBP4    | formin binding protein 4                                                                     |
| MIDORI   | likely ortholog of mouse myocytic induction/differentiation originator                       |
| WWP2     | WW domain containing E3 ubiquitin protein ligase 2, transcript variant 1                     |
| MYO18A   | myosin XVIII A, transcript variant 1                                                         |
| FLJ21616 | hypothetical protein FLJ21616                                                                |
| FLJ11838 | hypothetical protein FLJ11838                                                                |
| ADAM19   | a disintegrin and metalloproteinase domain 19 (meltrin beta), transcript variant 2           |
| PRDM13   | PR domain containing 13                                                                      |
| CPEB4    | cytoplasmic polyadenylation element binding protein 4                                        |
| SRPR     | signal recognition particle receptor ('docking protein')                                     |
| NPC1     | Niemann-Pick disease, type C1                                                                |
| VPS54    | vacuolar protein sorting 54 (yeast), transcript variant 2, mRNA                              |
| KLF4     | Kruppel-like factor 4 (gut)                                                                  |
| ARF1     | ADP-ribosylation factor 1                                                                    |
| FUNDC1   | FUN14 domain containing 1                                                                    |

|          |                                                                                            |
|----------|--------------------------------------------------------------------------------------------|
| GOLGA4   | golgi autoantigen, golgin subfamily a, 4                                                   |
| FOXG1B   | forkhead box G1B                                                                           |
| NFIB     | nuclear factor I/B                                                                         |
| C22orf5  | chromosome 22 open reading frame 5                                                         |
| CLK3     | CDC-like kinase 3, transcript variant phclk3/152                                           |
| PCANAP6  | prostate cancer associated protein 6                                                       |
| CEBPA    | CCAAT/enhancer binding protein (C/EBP), alpha                                              |
| CXXC5    | CXXC finger 5                                                                              |
| MARK1    | MAP/microtubule affinity-regulating kinase 1                                               |
| SUI1     | putative translation initiation factor                                                     |
| TNFSF6   | tumor necrosis factor (ligand) superfamily, member 6                                       |
| C20orf39 | chromosome 20 open reading frame 39                                                        |
| SEC24C   | SEC24 related gene family, member C (S. cerevisiae), transcript variant 1                  |
| SDFR1    | stromal cell derived factor receptor 1, transcript variant beta                            |
| C9orf150 | chromosome 9 open reading frame 150                                                        |
| FLJ46347 | hypothetical LOC389064                                                                     |
| HERC2    | hect domain and RLD 2                                                                      |
| HNRPA1   | heterogeneous nuclear ribonucleoprotein A1, transcript variant 1                           |
| KIAA1196 | KIAA1196 protein                                                                           |
| DUSP5    | dual specificity phosphatase 5                                                             |
| MLL5     | myeloid/lymphoid or mixed-lineage leukemia 5 (trithorax homolog, Drosophila)               |
| ZDHHC5   | zinc finger, DHHC domain containing 5                                                      |
| TRAM2    | translocation associated membrane protein 2                                                |
| KIAA1043 | KIAA1043 protein                                                                           |
| ALS2CR3  | amyotrophic lateral sclerosis 2 (juvenile) chromosome region, candidate 3                  |
| 13CDNA73 | hypothetical protein CG003                                                                 |
| ATP2A2   | ATPase, Ca <sup>++</sup> transporting, cardiac muscle, slow twitch 2, transcript variant 2 |
| GPR124   | G protein-coupled receptor 124                                                             |
| HAPIP    | huntingtin-associated protein interacting protein (duo)                                    |

|          |                                                                                             |
|----------|---------------------------------------------------------------------------------------------|
| C6orf62  | chromosome 6 open reading frame 62                                                          |
| MYCBP2   | MYC binding protein 2                                                                       |
| MGC29816 | hypothetical protein MGC29816                                                               |
| SLC38A2  | solute carrier family 38, member 2                                                          |
| ZFHX1B   | zinc finger homeobox 1b                                                                     |
| COL12A1  | collagen, type XII, alpha 1, transcript variant long                                        |
| FLJ10159 | hypothetical protein FLJ10159                                                               |
| EGR2     | early growth response 2 (Krox-20 homolog, Drosophila)                                       |
| FLJ13855 | hypothetical protein FLJ13855                                                               |
| RYR3     | ryanodine receptor 3                                                                        |
| CREB1    | cAMP responsive element binding protein 1, transcript variant A                             |
| SP192    | hypothetical protein SP192                                                                  |
| RANBP9   | RAN binding protein 9                                                                       |
| FBN1     | fibrillin 1 (Marfan syndrome)                                                               |
| COL1A2   | collagen, type I, alpha 2                                                                   |
| GATA6    | GATA binding protein 6                                                                      |
| PTPRO    | protein tyrosine phosphatase, receptor type, O, transcript variant 2                        |
| CACNA1C  | calcium channel, voltage-dependent, L type, alpha 1C subunit                                |
| MGC39325 | hypothetical protein MGC39325                                                               |
| SLC24A3  | solute carrier family 24 (sodium/potassium/calcium exchanger), member 3                     |
| DNAJB12  | DnaJ (Hsp40) homolog, subfamily B, member 12, transcript variant 2                          |
| NFAT5    | nuclear factor of activated T-cells 5, tonicity-responsive, transcript variant 3            |
| MLL5     | myeloid/lymphoid or mixed-lineage leukemia 5 (trithorax homolog, Drosophila)                |
| CBFA2T3  | core-binding factor, runt domain, alpha subunit 2; translocated to, 3, transcript variant 2 |
| SUV420H1 | suppressor of variegation 4-20 homolog 1 (Drosophila), transcript variant 1                 |
| CBLN4    | cerebellin 4 precursor                                                                      |
| DYRK2    | dual-specificity tyrosine-(Y)-phosphorylation regulated kinase 2, transcript variant 1      |



|              |                                                                                |
|--------------|--------------------------------------------------------------------------------|
| SCUBE3       | signal peptide, CUB domain, EGF-like 3                                         |
| POLK         | polymerase (DNA directed) kappa                                                |
| PHF15        | PHD finger protein 15                                                          |
| FLJ11011     | hypothetical protein FLJ1101, transcript variant 3                             |
| DUSP10       | dual specificity phosphatase 10, transcript variant 2                          |
| DUSP6        | dual specificity phosphatase 6, transcript variant 1                           |
| JUN          | v-jun sarcoma virus 17 oncogene homolog (avian)                                |
| TAF1         | TAF1 protein                                                                   |
| STRN         | striatin, calmodulin binding protein                                           |
| ELOVL4       | elongation of very long chain fatty acids (FEN1/Elo2, SUR4/Elo3, yeast)-like 4 |
| ZFPM2        | zinc finger protein, multitype 2                                               |
| DSC2         | desmocollin 2, transcript variant Dsc2a                                        |
| SSFA2        | sperm specific antigen 2                                                       |
| USP28        | ubiquitin specific protease 28                                                 |
| NS3TP2       | HCV NS3-transactivated protein 2                                               |
| POLS         | polymerase (DNA directed) sigma                                                |
| GOLGA3       | golgi autoantigen, golgin subfamily a, 3                                       |
| DNAJB12      | DnaJ (Hsp40) homolog, subfamily B, member 12, transcript variant 1             |
| EPS8         | epidermal growth factor receptor pathway substrate 8                           |
| DPP10        | dipeptidylpeptidase 10, transcript variant 1                                   |
| DKFZP566B183 | DKFZP566B183 protein                                                           |
| TEF          | thyrotrophic embryonic factor                                                  |
| KCNJ3        | potassium inwardly-rectifying channel, subfamily J, member 3                   |
| INSIG1       | insulin induced gene 1, transcript variant 2                                   |
| PAX3         | paired box gene 3 (Waardenburg syndrome 1), transcript variant PAX3E           |
| PAX3E        |                                                                                |
| TOP1         | topoisomerase (DNA)                                                            |
| EPC2         | enhancer of polycomb homolog 2 (Drosophila)                                    |
| MYLIP        | myosin regulatory light chain interacting protein                              |
| RNF4         | ring finger protein 4                                                          |

|          |                                                                                     |
|----------|-------------------------------------------------------------------------------------|
| HMGA2    | high mobility group AT-hook 2                                                       |
| PAX3     | paired box gene 3 (Waardenburg syndrome 1), transcript variant PAX3H                |
| PAX3H    |                                                                                     |
| DSC2     | desmocollin 2, transcript variant Dsc2b                                             |
| SNN      | stannin                                                                             |
| NEGR1    | neuronal growth regulator 1                                                         |
| INSIG1   | insulin induced gene 1, transcript variant 1                                        |
| PAX3     | paired box gene 3 (Waardenburg syndrome 1), transcript variant PAX3                 |
| SCN3A    | sodium channel, voltage-gated, type III, alpha                                      |
| INSIG1   | insulin induced gene 1, transcript variant 3                                        |
| BAZ2B    | bromodomain adjacent to zinc finger domain, 2B                                      |
| CIT      | citron (rho-interacting, serine/threonine kinase 21)                                |
| P66beta  | transcription repressor p66 beta component of the MeCP1 complex                     |
| PPP1R12A | protein phosphatase 1, regulatory (inhibitor) subunit 12A                           |
| EN2      | engrailed homolog 2                                                                 |
| PTGER4   | prostaglandin E receptor 4 (subtype EP4)                                            |
| FLJ38101 | hypothetical protein FLJ38101                                                       |
| PER2     | period homolog 2 (Drosophila), transcript variant 1                                 |
| SDC2     | syndecan 2 (heparan sulfate proteoglycan 1, cell surface-associated, fibroglycan)   |
| DLGAP2   | discs, large (Drosophila) homolog-associated protein 2                              |
| ITR      | intimal thickness-related receptor                                                  |
| PAX3     | paired box gene 3 (Waardenburg syndrome 1), transcript variant PAX3D                |
| PAX3D    |                                                                                     |
| UBE2G1   | ubiquitin-conjugating enzyme E2G 1 (UBC7 homolog, C. elegans), transcript variant 1 |
| PITPNA   | phosphatidylinositol transfer protein, alpha                                        |
| HAS3     | hyaluronan synthase 3, transcript variant 1                                         |
| CNTN4    | contactin 4, transcript variant 1                                                   |
| RAD21    | RAD21 homolog (S. pombe)                                                            |
| NPTX1    | neuronal pentraxin I                                                                |

|          |                                                                                              |
|----------|----------------------------------------------------------------------------------------------|
| BAZ2A    | bromodomain adjacent to zinc finger domain, 2A                                               |
| UBE2G1   | ubiquitin-conjugating enzyme E2G 1 (UBC7 homolog, <i>C. elegans</i> ), transcript variant 2  |
| LKAP     | limkain b1, transcript variant 1                                                             |
| FLJ11011 | hypothetical protein FLJ11011, transcript variant 1                                          |
| OACT2    | O-acyltransferase (membrane bound) domain containing 2                                       |
| NLK      | nemo like kinase                                                                             |
| C13orf6  | chromosome 13 open reading frame 6                                                           |
| BCL2L11  | BCL2-like 11 (apoptosis facilitator), transcript variant 6                                   |
| CAMKK2   | calcium/calmodulin-dependent protein kinase kinase 2, beta, transcript variant 7             |
| CAMKK2   | calcium/calmodulin-dependent protein kinase kinase 2, beta, transcript variant 1             |
| ADAMTSL3 | ADAMTS-like 3                                                                                |
| KLF12    | Kruppel-like factor 12, transcript variant 1                                                 |
| PDE4D    | phosphodiesterase 4D, cAMP-specific (phosphodiesterase E3 dunce homolog, <i>Drosophila</i> ) |
| LIN28    | lin-28 homolog ( <i>C. elegans</i> )                                                         |
| BCL2L11  | BCL2-like 11 (apoptosis facilitator), transcript variant 7                                   |
| FBXO33   | F-box protein 33                                                                             |
| SGPP1    | sphingosine-1-phosphate phosphatase 1                                                        |
| NR4A3    | nuclear receptor subfamily 4, group A, member 3, transcript variant 1                        |
| PAPOLA   | poly(A) polymerase alpha                                                                     |
| OSR1     | oxidative-stress responsive 1                                                                |
| PCAF     | p300/CBP-associated factor                                                                   |
| ZDHHC21  | zinc finger, DHHC domain containing 21                                                       |
| FMR1     | fragile X mental retardation 1                                                               |
| LUZP1    | leucine zipper protein 1                                                                     |
| STAG2    | stromal antigen 2                                                                            |
| DMXL1    | Dmx-like 1                                                                                   |
| TEAD1    | TEA domain family member 1 (SV40 transcriptional enhancer factor)                            |
| SYNJ1    | synaptojanin 1, transcript variant 1                                                         |

|                      |                                                                                                                                                 |
|----------------------|-------------------------------------------------------------------------------------------------------------------------------------------------|
| PRKCE                | protein kinase C, epsilon                                                                                                                       |
| E2F3                 | E2F transcription factor 3                                                                                                                      |
| PAPOLB               | poly(A) polymerase beta (testis specific)                                                                                                       |
| C17orf39             | chromosome 17 open reading frame 39                                                                                                             |
| RAB14                | RAB14, member RAS oncogene family                                                                                                               |
| CFL2                 | cofilin 2 (muscle), transcript variant 1                                                                                                        |
| TSC1                 | tuberous sclerosis 1                                                                                                                            |
| ARRDC4               | arrestin domain containing 4                                                                                                                    |
| MCL1                 | myeloid cell leukemia sequence 1 (BCL2-related), transcript variant 1                                                                           |
| PAFAH1B1             | platelet-activating factor acetylhydrolase, isoform Ib, alpha subunit 45kDa                                                                     |
| ESRRG                | estrogen-related receptor gamma, transcript variant 1                                                                                           |
| RNF3                 | ring finger protein 3                                                                                                                           |
| SATB2                | SATB family member 2                                                                                                                            |
| ATRX                 | alpha thalassemia/mental retardation syndrome X-linked (RAD54 homolog, <i>S. cerevisiae</i> ), transcript variant 1                             |
| ARRDC3               | arrestin domain containing 3                                                                                                                    |
| SLC12A2              | solute carrier family 12 (sodium/potassium/chloride transporters), member 2                                                                     |
| TBDN100              | transcriptional coactivator tubedown-100, transcript variant 1                                                                                  |
| APRIN                | androgen-induced proliferation inhibitor                                                                                                        |
| BCL11A               | B-cell CLL/lymphoma 11A (zinc finger protein), transcript variant 1                                                                             |
| HSHIN1               | HIV-1 induced protein HIN-1, transcript variant 1                                                                                               |
| GPR85                | G protein-coupled receptor 85                                                                                                                   |
| CHES1                | checkpoint suppressor 1                                                                                                                         |
| CUL3                 | cullin 3                                                                                                                                        |
| SEC10L1              | SEC10-like 1 ( <i>S. cerevisiae</i> )                                                                                                           |
| QKI                  | quaking homolog, KH domain RNA binding (mouse)                                                                                                  |
| transcript variant 2 |                                                                                                                                                 |
| OGT                  | O-linked N-acetylglucosamine (GlcNAc) transferase (UDP-N-acetylglucosamine: polypeptide-N-acetylglucosaminyl transferase), transcript variant 3 |

|                             |                                                |
|-----------------------------|------------------------------------------------|
| QKI<br>transcript variant 3 | quaking homolog, KH domain RNA binding (mouse) |
| QKI<br>transcript variant 4 | quaking homolog, KH domain RNA binding (mouse) |
