# Supplementary material for: MicroRNA expression profile of human advanced coronary atherosclerotic plaques
Source: PubMed Central journal article supplement (PMC5959940; doi:10.1038/s41598-018-25690-4), 2018-05-18
Supplement: 41598_2018_25690_MOESM3_ESM.pdf [file 41598_2018_25690_MOESM3_ESM.pdf]

## **MicroRNA expression profile of human advanced coronary atherosclerotic plaques**

Mariana Parahuleva<sup>1, 2\*</sup>, Christoph Lipps<sup>2</sup>, Behnoush Parviz<sup>2</sup>, Hans Hölschermann<sup>3</sup>, Bernhard Schieffer<sup>1</sup>, Rainer Schulz<sup>2</sup>, Gerhild Euler<sup>2</sup>

Internal Medicine/Cardiology and Angiology, University Hospital of Giessen and Marburg, Location Marburg<sup>1</sup>; Internal Medicine I/Cardiology and Angiology, University Hospital of Giessen and Marburg, Location Giessen<sup>2</sup>; Krankenhaus Bad Homburg Innere Medizin I – Kardiologie, Bad Homburg<sup>3</sup>, Germany

**Suppl. Table S3. Predicted target genes of miR-99a found using TargetScan PicTar database.**

| Gene symbol | Gene Name                                                                                                   |
|-------------|-------------------------------------------------------------------------------------------------------------|
| SMARCA5     | SWI/SNF related, matrix associated, actin dependent regulator of chromatin, subfamily a, member 5           |
| BAZ2A       | bromodomain adjacent to zinc finger domain, 2A                                                              |
| VLDLR       | very low density lipoprotein receptor                                                                       |
| HS3ST3B1    | heparan sulfate (glucosamine) 3-O-sulfotransferase 3B1                                                      |
| HS3ST2      | heparan sulfate (glucosamine) 3-O-sulfotransferase 2                                                        |
| FOXA1       | forkhead box A1                                                                                             |
| EPC2        | enhancer of polycomb homolog 2 (Drosophila)                                                                 |
| FRAP1       | FK506 binding protein 12-rapamycin associated protein 1                                                     |
| EIF2C2      | eukaryotic translation initiation factor 2C, 2                                                              |
| C4orf16     | chromosome 4 open reading frame 16                                                                          |
| FZD8        | frizzled homolog 8 (Drosophila)                                                                             |
| INSM1       | insulinoma-associated 1                                                                                     |
| HOXA1       | homeo box A1, transcript variant 1                                                                          |
| KIAA1579    | hypothetical protein FLJ10770                                                                               |
| CDW92       | CDW92 antigen                                                                                               |
| MGC39518    | hypothetical protein MGC39518                                                                               |
| HOXA1       | homeo box A1, transcript variant 2                                                                          |
| MBNL1       | muscleblind-like (Drosophila), transcript variant 1                                                         |
| MBNL1       | muscleblind-like (Drosophila), transcript variant 7                                                         |
| PHOX2B      | paired-like homeobox 2b                                                                                     |
| TA-KRP      | T-cell activation kelch repeat protein                                                                      |
| FGFR3       | fibroblast growth factor receptor 3 (achondroplasia, thanatophoric dwarfism), transcript variant 1          |
| TRIB2       | tribbles homolog 2 (Drosophila)                                                                             |
| ZDHHC18     | zinc finger, DHHC domain containing 18                                                                      |
| ZZEF1       | zinc finger, ZZ type with EF hand domain 1                                                                  |
| MTMR3       | myotubularin related protein 3, transcript variant 3                                                        |
| ICMT        | isoprenylcysteine carboxyl methyltransferase, transcript variant 1                                          |
| OGT         | O-linked N-acetylglucosamine (GlcNAc) transferase (UDP-N-acetylglucosamine:polypeptide-N-acetylglucosaminyl |

|         |                                                                                                                                                     |
|---------|-----------------------------------------------------------------------------------------------------------------------------------------------------|
| TRAF7   | transferase: polypeptide-N-acetylglucosaminyl transferase)<br>(OGT), transcript variant 3                                                           |
| CYP26B1 | TNF receptor-associated factor 7, transcript variant 2                                                                                              |
| CTDSPL  | cytochrome P450, family 26, subfamily B, polypeptide 1<br>CTD (carboxy-terminal domain, RNA polymerase II,<br>polypeptide A) small phosphatase-like |
| ADCY1   | adenylate cyclase 1 (brain)                                                                                                                         |

---
