# Supplementary material for: MicroRNA expression profile of human advanced coronary atherosclerotic plaques
Source: PubMed Central journal article supplement (PMC5959940; doi:10.1038/s41598-018-25690-4), 2018-05-18

## **MicroRNA expression profile of human advanced coronary atherosclerotic plaques**

Mariana Parahuleva<sup>1,2\*</sup>, Christoph Lipps<sup>2</sup>, Behnoush Parviz<sup>2</sup>, Hans Hölschermann<sup>3</sup>, Bernhard Schieffer<sup>1</sup>, Rainer Schulz<sup>2</sup>, Gerhild Euler<sup>2</sup>

Internal Medicine/Cardiology and Angiology, University Hospital of Giessen and Marburg, Location Marburg<sup>1</sup>; Internal Medicine I/Cardiology and Angiology, University Hospital of Giessen and Marburg, Location Giessen<sup>2</sup>; Krankenhaus Bad Homburg Innere Medizin I – Kardiologie, Bad Homburg<sup>3</sup>, Germany

## Study design flow chart

### Literature review

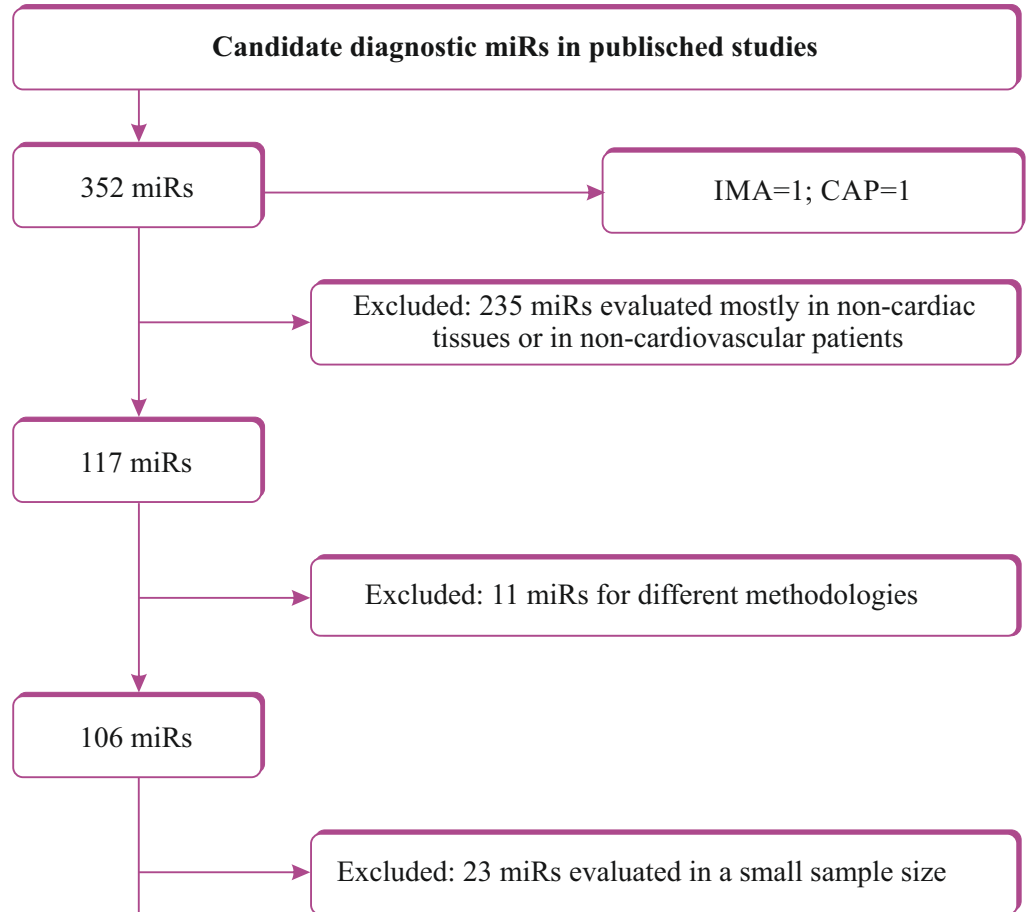

### In silico analysis phase

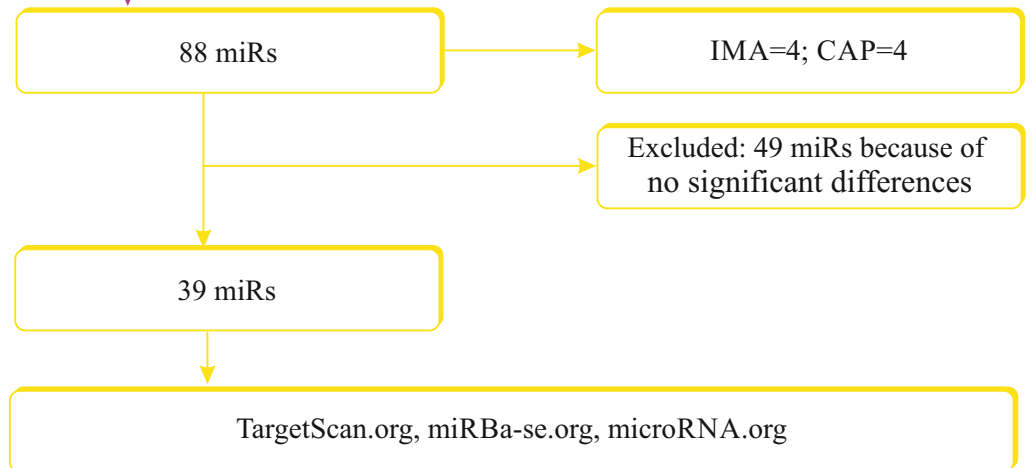

### Identification phase

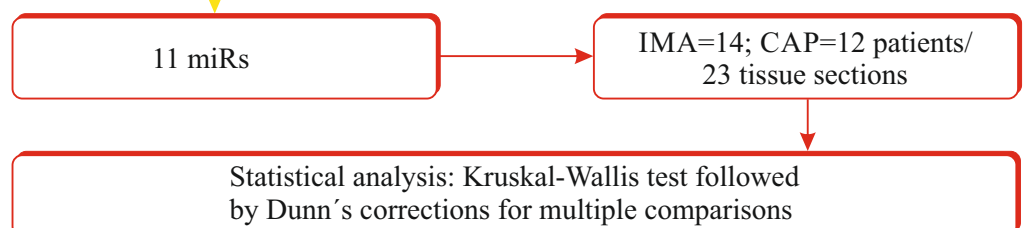

Supplement: 41598_2018_25690_MOESM4_ESM.pdf [file 41598_2018_25690_MOESM4_ESM.pdf]
